# Supplementary material for: Longitudinal Associations of Electroconvulsive Therapy with All-cause Mortality and Suicide Deaths in Depression and Other Psychiatric Disorders: A Systematic Review and Meta-Analysis
Source: Research Square preprint supplement (doi:10.21203/rs.3.rs-6180102/v1), 2025-03-31
Supplement: Supplementary file 1 [file 04c615f3b26b04cbf4cc9024.docx]

**Supplementary Materials**

Rhee TG, Shim SR, Nasir M, McIntyre RS, Kaster TS, & Wilkinson ST. Longitudinal Associations of Electroconvulsive Therapy with All-cause Mortality and Suicide Deaths in Depression and Other Psychiatric Disorders: A Systematic Review and Meta-Analysis. *Molecular Psychiatry*.

**Supplementary Figure 1**. Cumulative forest plot of all-cause mortality by year

**Supplementary Figure 2**. Cumulative forest plot of suicide mortality by year

**Supplementary Figure 3**. Forest plots of all-cause mortality by period (1 month; 3 months; 6 months; and 12 months)

**Supplementary Figure 4**. Forest plots of suicide mortality by period (1 month; 3 months; 6 months; and 12 months)

**Supplementary Figure 5**. Funnel plot for publication bias (or small study effects) assessments for all-cause mortality reported in **Figure 1**

**Supplementary Figure 6**. Funnel plot for publication bias (or small study effects) assessments for all-cause mortality reported in **Figure 2**

**Supplementary Table 1**. Database and search strategy

**Supplementary Table 2**. Meta-analyses of Observational Studies in Epidemiology (MOOSE) Checklist

**Supplementary Table 3**. Moderation analyses of all-cause mortality by period

**Supplementary Table 4**. Moderation analyses of suicide by period

**Supplementary Table 5**. Newcastle-Ottawa quality assessment of individual studies

**Supplementary References**.

This supplemental material has been provided by the authors to give readers additional information about their work.

**Supplementary Figure 1**. Cumulative forest plot of all-cause mortality by year


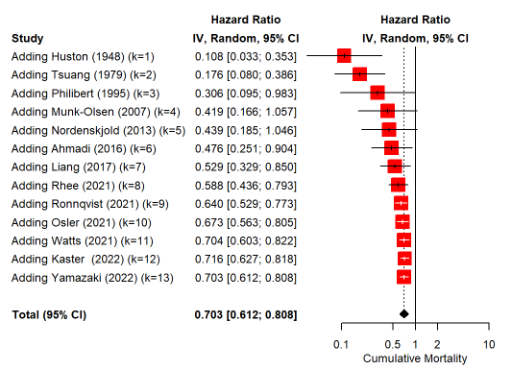


**Note**: A hazard ratio of <1.0 indicates a reduction of all-cause mortality in the ECT group (i.e., favors ECT).

**Supplementary Figure 2**. Cumulative forest plot of suicide mortality by year


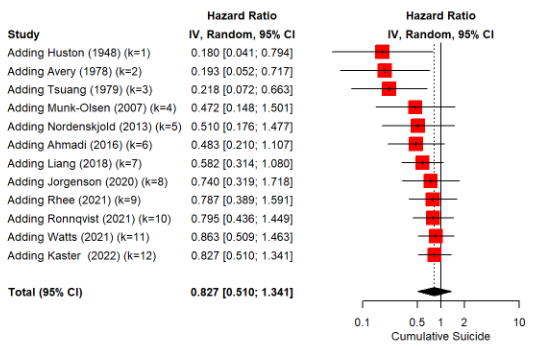


**Note**: A hazard ratio of <1.0 indicates a reduction of suicide deaths in the ECT group (i.e., favors ECT).

**Supplementary Figure 3**. Forest plots of all-cause mortality by period (1 month; 3 months; 6 months; and 12 months)

**Supplementary Figure 3A.** Forest plots of all-cause mortality at 1 month


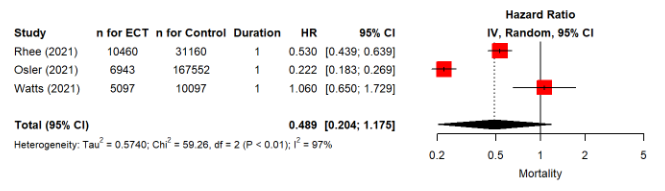


**Supplementary Figure 3B.** Forest plots of all-cause mortality at 3 months


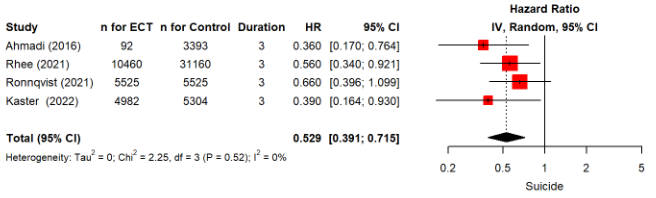


**Supplementary Figure 3C.** Forest plots of all-cause mortality at 6 months


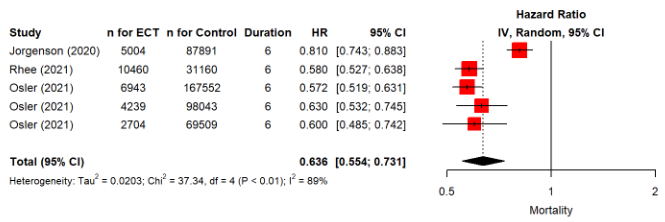


**Supplementary Figure 3D.** Forest plots of all-cause mortality at 12 months


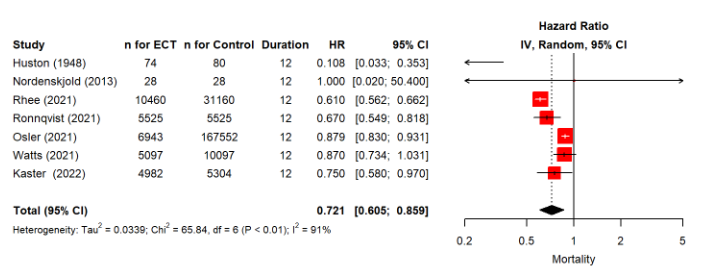


**Note**: A hazard ratio of <1.0 indicates a reduction of all-cause mortality in the ECT group (i.e., favors ECT).

**Supplementary Figure 4**. Forest plots of suicide mortality by period (1 month; 3 months; 6 months; and 12 months)

**Supplementary Figure 4A.** Forest plots of suicide mortality at 1 month


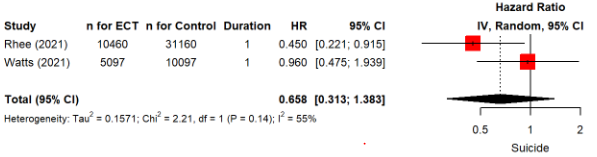


**Supplementary Figure 4B.** Forest plots of suicide mortality at 3 months


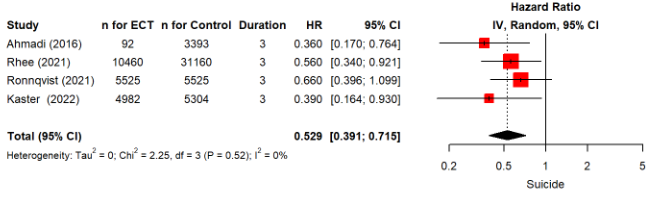


**Supplementary Figure 4C.** Forest plots of suicide mortality at 6 months


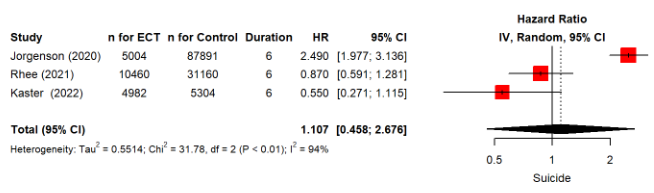


**Supplementary Figure 4D.** Forest plots of suicide mortality at 12 months


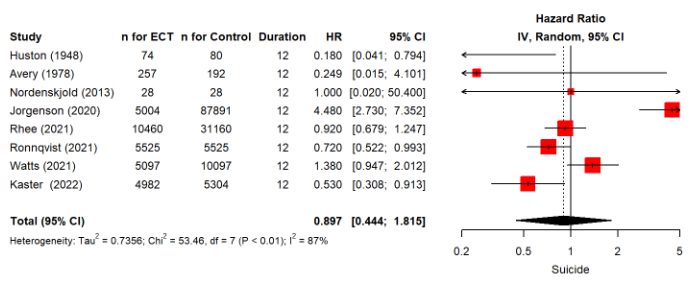


**Note**: A hazard ratio of <1.0 indicates a reduction of suicide deaths in the ECT group (i.e., favors ECT).

**Supplementary Figure 5**. Funnel plot for publication bias (or small study effects) assessments for all-cause mortality reported in **Figure 1**


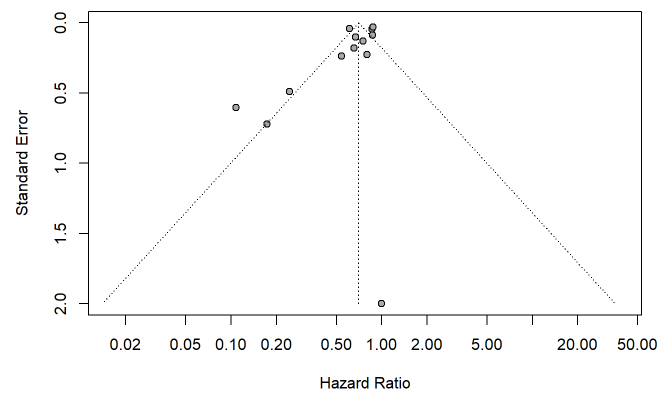


**Note:** Using an inverse variance weighting method, *τ*2 (tau-squared), multiplicative residual heterogeneity variance, was 5.87. Using Egger’s test (i.e., linear regression test of funnel plot asymmetry), we did not find any evidence for publication bias (*p*=0.099). Using Begg and Mazumdar’s test (i.e., rank correlation test of funnel plot asymmetry), we did not find any evidence for publication bias (*p*=0.143).

**Supplementary Figure 6**. Funnel plot for publication bias (or small study effects) assessments for all-cause mortality reported in **Figure 2**


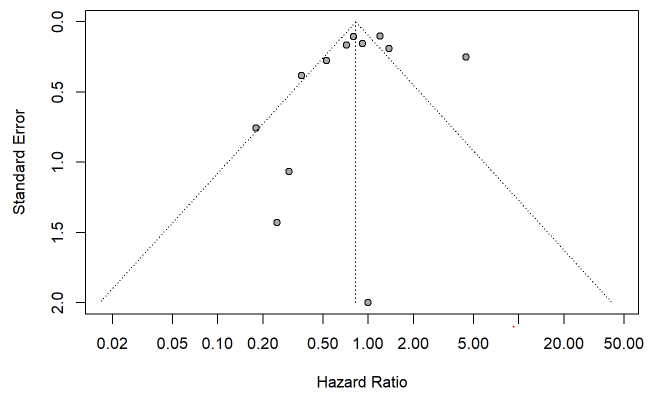


**Note:** Using an inverse variance weighting method, *τ*2 (tau-squared), multiplicative residual heterogeneity variance, was 6.63. Using Egger’s test (i.e., linear regression test of funnel plot asymmetry), we did not find any evidence for publication bias (*p*=0.499). Using Begg and Mazumdar’s test (i.e., rank correlation test of funnel plot asymmetry), we did not find any evidence for publication bias (*p*=0.891).

**Supplementary Table 1.** Search strategy

| # | Strategy | Results |
| --- | --- | --- |
| 1 | ECT.mp. [mp=ti, bt, ab, ot, nm, hw, fx, kf, ox, px, rx, ui, an, sy, ux, mx, tn, dm, mf, dv, dq, tc, id, tm] | 36,920 |
| 2 | electroconvulsive*.mp. [mp=ti, bt, ab, ot, nm, hw, fx, kf, ox, px, rx, ui, an, sy, ux, mx, tn, dm, mf, dv, dq, tc, id, tm] | 55,966 |
| 3 | electroshock*.mp. [mp=ti, bt, ab, ot, nm, hw, fx, kf, ox, px, rx, ui, an, sy, ux, mx, tn, dm, mf, dv, dq, tc, id, tm] | 27,190 |
| 4 | shock-therapy.mp. [mp=ti, bt, ab, ot, nm, hw, fx, kf, ox, px, rx, ui, an, sy, ux, mx, tn, dm, mf, dv, dq, tc, id, tm] | 14,533 |
| 5 | convulsive-therapy.mp. [mp=ti, bt, ab, ot, nm, hw, fx, kf, ox, px, rx, ui, an, sy, ux, mx, tn, dm, mf, dv, dq, tc, id, tm] | 5,997 |
| 6 | 1 or 2 or 3 or 4 or 5 | 94,233 |
| 7 | mortality.mp. [mp=ti, bt, ab, ot, nm, hw, fx, kf, ox, px, rx, ui, an, sy, ux, mx, tn, dm, mf, dv, dq, tc, id, tm] | 3,656,942 |
| 8 | death.mp. [mp=ti, bt, ab, ot, nm, hw, fx, kf, ox, px, rx, ui, an, sy, ux, mx, tn, dm, mf, dv, dq, tc, id, tm] | 2,893,556 |
| 9 | suicide.mp. [mp=ti, bt, ab, ot, nm, hw, fx, kf, ox, px, rx, ui, an, sy, ux, mx, tn, dm, mf, dv, dq, tc, id, tm] | 321,492 |
| 10 | suicid*.mp. [mp=ti, bt, ab, ot, nm, hw, fx, kf, ox, px, rx, ui, an, sy, ux, mx, tn, dm, mf, dv, dq, tc, id, tm] | 388,860 |
| 11 | 7 or 8 or 9 or 10 | 6,089,474 |
| 12 | 6 and 11 | 8,737 |
| 13 | limit 12 to humans [Limit not valid in APA PsycInfo; records were retained] | 7,530 |
|  | Total: | **7,530** |

**Note**: All searches were completed and updated on January 21, 2025 using PubMed/MEDLINE, Embase, PsycINFO, and Cochrane Library.1

**Supplementary Table 2**. Meta-analyses of Observational Studies in Epidemiology (MOOSE) Checklist

| **Item No** | **Recommendation** | **Reported**  **on Page No** |
| --- | --- | --- |
| Reporting of background should include | | |
| 1 | Problem definition | 4-5 |
| 2 | Hypothesis statement | 4-5 |
| 3 | Description of study outcome(s) | 6-7 |
| 4 | Type of exposure or intervention used | 6-7 |
| 5 | Type of study designs used | 6-7 |
| 6 | Study population | 6-7 |
| Reporting of search strategy should include | | |
| 7 | Qualifications of searchers (eg, librarians and investigators) | n/a |
| 8 | Search strategy, including time period included in the synthesis and key words | 5 |
| 9 | Effort to include all available studies, including contact with authors | 6-7 |
| 10 | Databases and registries searched | 5 |
| 11 | Search software used, name and version, including special features used (eg, explosion) | 9 |
| 12 | Use of hand searching (eg, reference lists of obtained articles) | 6-7 |
| 13 | List of citations located and those excluded, including justification | 6-7 |
| 14 | Method of addressing articles published in languages other than English | 6-7 |
| 15 | Method of handling abstracts and unpublished studies | 6-7 |
| 16 | Description of any contact with authors | n/a |
| Reporting of methods should include | | |
| 17 | Description of relevance or appropriateness of studies assembled for assessing the hypothesis to be tested | 6-7 |
| 18 | Rationale for the selection and coding of data (eg, sound clinical principles or convenience) | 6-7 |
| 19 | Documentation of how data were classified and coded (eg, multiple raters, blinding and interrater reliability) | 6-8 |
| 20 | Assessment of confounding (eg, comparability of cases and controls in studies where appropriate) | 7-8 |
| 21 | Assessment of study quality, including blinding of quality assessors, stratification or regression on possible predictors of study results | 7-8 |
| 22 | Assessment of heterogeneity | 7-8 |
| 23 | Description of statistical methods (eg, complete description of fixed or random effects models, justification of whether the chosen models account for predictors of study results, dose-response models, or cumulative meta-analysis) in sufficient detail to be  replicated | 8-9 |
| 24 | Provision of appropriate tables and graphics | 8-9 |
| Reporting of results should include | | |
| 25 | Graphic summarizing individual study estimates and overall estimate | 9-12 |
| 26 | Table giving descriptive information for each study included | 9-12 |
| 27 | Results of sensitivity testing (eg, subgroup analysis) | 9-12 |
| 28 | Indication of statistical uncertainty of findings | 9-12 |
| Reporting of discussion should include | | |
| 29 | Quantitative assessment of bias (eg, publication bias) | Appendix |
| 30 | Justification for exclusion (eg, exclusion of non-English language citations) | n/a |
| 31 | Assessment of quality of included studies | Appendix |
| Reporting of conclusions should include | | |
| 32 | Consideration of alternative explanations for observed results | 12-14 |
| 33 | Generalization of the conclusions (ie, appropriate for the data presented and within the domain of the literature review) | 12-14 |
| 34 | Guidelines for future research | 14 |
| 35 | Disclosure of funding source | 17 |

**Note**: This checklist is from the MOOSE checklist.2

**Supplementary Table 3**. Moderation analyses of all-cause mortality by period

**Supplementary Table 3A**. Moderation analyses of all-cause mortality at 3 months

| **Moderator** | ***k*** | **Coefficient (95% CI)** | **Hazard ratio (95% CI)** | ***P*-value** |
| --- | --- | --- | --- | --- |
| Number of total patients | 4 | 0.00 (-0.00 to 0.00) | - | 0.260* |
| Outcome measure |  |  |  |  |
| Hazard ratio | 3 | - | 0.49 (0.39-0.62) | 0.712† |
| Relative risk | 1 | - | 0.54 (0.34-0.86) |
| Age |  |  |  |  |
| Overall | 4 | 0.01 (-0.01 to 0.02) | - | 0.285* |
| Female sex | 4 | -0.00 (-0.01 to 0.01) | - | 0.877* |
| Condition |  |  |  |  |
| % major depressive disorder | 4 | -0.01 (-0.02 to 0.01) | - | 0.466* |
| % psychotic depression | 3 | -0.02 (-0.05 to 0.02) | - | 0.308* |
| % bipolar disorder | 3 | -0.01 (-0.03 to 0.01) | - | 0.313* |
| Region |  |  |  |  |
| United States | 2 | - | 0.54 (0.48-0.61) | 0.154† |
| Sweden | 1 | - | 0.43 (0.30-0.61) |
| Japan | 1 | - | 0.17 (0.04-0.72) |

**Supplementary Table 3B**. Moderation analyses of all-cause mortality at 6 months

| **Moderator** | ***k*** | **Coefficient (95% CI)** | **Hazard ratio (95% CI)** | ***P*-value** |
| --- | --- | --- | --- | --- |
| Number of total patients | 5 | -0.00 (-0.00 to 0.00) | - | 0.860* |
| Outcome measure |  |  |  |  |
| Hazard ratio | 5 | - | 0.63 (0.55-0.73) | <0.001† |
| Age |  |  |  |  |
| Overall | 5 | -0.01 (-0.02 to -0.00) | - | 0.011* |
| 65 or older only | 3 | -0.01 (-0.00 to 0.00) | - | 0.399* |
| Female sex | 3 | -0.02 (-0.06 to -0.03) | - | 0.531* |
| Condition |  |  |  |  |
| % major depressive disorder | 3 | 0.00 (-0.01 to 0.01) | - | 0.470* |
| % psychotic depression | 3 | 0.04 (-0.05 to 0.13) | - | 0.404* |
| % bipolar disorder | 3 | -0.01 (-0.02 to 0.01) | - | 0.470* |
| % psychosis or schizophrenic spectrum disorder | 1 | -0.55 (-0.64 to -0.45) | - | <0.001* |
| Region |  |  |  |  |
| United States | 4 | - | 0.65 (0.55-0.77) | 0.234† |
| Denmark | 1 | - | 0.58 (0.53-0.64) |

**Supplementary Table 3C**. Moderation analyses of all-cause mortality at 12 months

| **Moderator** | ***k*** | **Coefficient (95% CI)** | **Hazard ratio (95% CI)** | ***P*-value** |
| --- | --- | --- | --- | --- |
| Number of total patients | 7 | 0.00 (-0.00 to 0.00) | - | 0.262* |
| Outcome measure |  |  |  |  |
| Hazard ratio | 6 | - | 0.68 (0.55-0.85) | 0.083† |
| Odds ratio | 1 | - | 0.87 (0.73-1.03) |
| Age |  |  |  |  |
| Overall | 7 | -0.01 (-0.02 to 0.02) | - | 0.873* |
| 65 or older only | 3 | 0.01 (-0.02 to 0.04) | - | 0.475* |
| Female sex | 6 | -0.01 (-0.01 to -0.00) | - | <0.001* |
| Condition |  |  |  |  |
| % major depressive disorder | 6 | -0.02 (-0.07 to 0.03) | - | 0.432* |
| % psychotic depression | 4 | 0.01 (-0.00 to 0.01) | - | 0.143* |
| % bipolar disorder | 5 | 0.01 (-0.00 to 0.02) | - | 0.233* |
| % psychosis or schizophrenic spectrum disorder | 5 | 0.010 (-0.01 to 0.03) | - | 0.203* |
| Region |  |  |  |  |
| United States | 3 | - | 0.44 (0.15-1.34) | 0.030† |
| Canada | 1 | - | 0.75 (0.58-0.97) |
| Sweden | 2 | - | 0.67 (0.55-0.82) |
| Denmark | 1 | - | 0.88 (0.83-0.93) |

**Note**: *k*, number of effect sizes; Coefficient, regression coefficient; CI, confidence interval. A restricted maximum likelihood (REML) was used. * denotes continuous moderators and †denotes categorical moderators.

**Supplementary Table 4**. Moderation analyses of suicide by period

**Supplementary Table 4A**. Moderation analyses of suicide at 3 months

| **Moderator** | ***k*** | **Coefficient (95% CI)** | **Hazard ratio (95% CI)** | ***P*-value** |
| --- | --- | --- | --- | --- |
| Number of total patients | 4 | 0.00 (-0.00 to 0.00) | - | 0.634* |
| Outcome measure |  |  |  |  |
| Hazard ratio | 3 | - | 0.57 (0.41-0.79) | 0.274† |
| Relative risk | 1 | - | 0.36 (0.17-0.76) |
| Age |  |  |  |  |
| Overall | 4 | 0.01 (-0.02 to 0.04) | - | 0.546* |
| Female sex | 4 | 0.01 (-0.01 to 0.02) | - | 0.373* |
| Condition |  |  |  |  |
| % major depressive disorder | 4 | -0.00 (-0.03 to 0.03) | - | 0.938* |
| % psychotic depression | 3 | 0.00 (-0.03 to 0.03) | - | 0.876* |
| % bipolar disorder | 3 | -0.01 (-0.05 to 0.03) | - | 0.523* |
| % psychosis or schizophrenic spectrum disorder | 3 | -0.00 (-0.11 to 0.10) | - | 0.946* |
| Region |  |  |  |  |
| United States | 2 | - | 0.49 (0.32-0.74) | 0.515† |
| Canada | 1 | - | 0.39 (0.16-0.93) |
| Sweden | 1 | - | 0.66 (0.40-1.10) |

**Supplementary Table 4B**. Moderation analyses of suicide at 6 months

| **Moderator** | ***k*** | **Coefficient (95% CI)** | **Hazard ratio (95% CI)** | ***P*-value** |
| --- | --- | --- | --- | --- |
| Number of total patients | 3 | 0.00 (-0.00 to 0.00) | - | <0.001* |
| Outcome measure |  |  |  |  |
| Hazard ratio | 3 | - | 1.11 (0.46-2.68) | 0.821† |
| Age |  |  |  |  |
| Overall | 3 | -0.01 (-0.09 to 0.07) | - | 0.762* |
| Region |  |  |  |  |
| United States | 1 | - | 0.87 (0.59-1.28) | <0.001† |
| Canada | 1 | - | 0.55 (0.27-1.12) |
| Denmark | 1 | - | 2.49 (1.98-3.14) |

**Supplementary Table 4C**. Moderation analyses of suicide at 12 months

| **Moderator** | ***k*** | **Coefficient (95% CI)** | **Hazard ratio (95% CI)** | ***P*-value** |
| --- | --- | --- | --- | --- |
| Number of total patients | 8 | 0.00 (0.00-0.00) | - | <0.001* |
| Outcome measure |  |  |  |  |
| Hazard ratio | 7 | - | 0.80 (0.34-1.88) | 0.254† |
| Odds ratio | 1 | - | 1.38 (0.95-2.01) |
| Age |  |  |  |  |
| Overall | 7 | -0.01 (-0.09 to 0.07) | - | 0.818* |
| 65 or older only | 3 | 0.01 (-0.01 to 0.03) | - | 0.340* |
| Female sex | 6 | -0.01 (-0.03 to 0.00) | - | 0.072* |
| Condition |  |  |  |  |
| % major depressive disorder | 6 | -0.02 (-0.07 to 0.03) | - | 0.396* |
| % psychotic depression | 4 | -0.01 (-0.03 to 0.01) | - | 0.170* |
| % bipolar disorder | 5 | 0.02 (0.00-0.03) | - | 0.007* |
| % psychosis or schizophrenic spectrum disorder | 5 | 0.03 (0.01-0.05) | - | 0.003* |
| Region |  |  |  |  |
| United States | 4 | - | 0.71 (0.30-1.72) | <0.001† |
| Canada | 1 | - | 0.53 (0.31-0.91) |
| Sweden | 2 | - | 0.72 (0.52-0.99) |
| Denmark | 1 | - | 4.48 (2.73-7.35) |

**Note**: *k*, number of effect sizes; Coefficient, regression coefficient; CI, confidence interval. A restricted maximum likelihood (REML) was used. * denotes continuous moderators and †denotes categorical moderators.

**Supplementary Table 5**. Newcastle-Ottawa quality assessment of individual studies

|  |  | **Selection** | |  |  | **Comparability** |  | **Outcome / Exposure** | | |  | **Total score** | **Quality power** |
| --- | --- | --- | --- | --- | --- | --- | --- | --- | --- | --- | --- | --- | --- |
|  | Representativeness of the exposed cohort | Selection of the non-exposed cohort | Ascertainment of exposure | Demonstration that outcome of interest was not present at start of study |  | Comparability of cohorts on the basis of the design or analysis |  | Assessment of outcome | Was follow-up long enough for outcomes to occur | Adequacy of follow up of cohorts |  |
| Huston (1948) |  |  | ★ | ★ |  |  |  | ★ | ★ | ★ |  | ★★★★★ (5) | Poor |
| Avery (1978) |  |  | ★ | ★ |  | ★ |  | ★ | ★ | ★ |  | ★★★★★★ (6) | Fair |
| Tsuang (1979) |  |  | ★ | ★ |  | ★ |  | ★ | ★ | ★ |  | ★★★★★★ (6) | Fair |
| Babigian (1984) | ★ | ★ | ★ | ★ |  | ★ |  | ★ | ★ | ★ |  | ★★★★★★★★ (8) | Good |
| Philibert (1995) |  |  | ★ | ★ |  | ★★ |  | ★ | ★ | ★ |  | ★★★★★★★ (7) | Fair |
| Munk-Olsen (2007) | ★ | ★ | ★ | ★ |  | ★★ |  | ★ | ★ | ★ |  | ★★★★★★★★★ (9) | Good |
| Nordenskjold (2013)* | ★ | ★ | ★ | ★ |  | ★★ |  | ★ | ★ | ★ |  | ★★★★★★★★★ (9) | Good |
| Ahmadi (2016) | ★ | ★ | ★ | ★ |  | ★★ |  | ★ |  | ★ |  | ★★★★★★★★ (8) | Good |
| Liang (2017) | ★ | ★ | ★ | ★ |  | ★★ |  | ★ | ★ | ★ |  | ★★★★★★★★★ (9) | Good |
| Liang (2018) | ★ | ★ | ★ | ★ |  | ★★ |  | ★ | ★ | ★ |  | ★★★★★★★★★ (9) | Good |
| Jorgenson (2020) | ★ | ★ | ★ | ★ |  | ★★ |  | ★ | ★ | ★ |  | ★★★★★★★★★ (9) | Good |
| Osler (2021) | ★ | ★ | ★ | ★ |  | ★★ |  | ★ | ★ | ★ |  | ★★★★★★★★★ (9) | Good |
| Rhee (2021) | ★ | ★ | ★ | ★ |  | ★★ |  | ★ | ★ | ★ |  | ★★★★★★★★★ (9) | Good |
| Ronnqvist (2021) | ★ | ★ | ★ | ★ |  | ★★ |  | ★ | ★ | ★ |  | ★★★★★★★★★ (9) | Good |
| Watts (2021; 2022) | ★ | ★ | ★ | ★ |  | ★★ |  | ★ | ★ | ★ |  | ★★★★★★★★★ (9) | Good |
| Kaster (2022) | ★ | ★ | ★ | ★ |  | ★★ |  | ★ | ★ | ★ |  | ★★★★★★★★★ (9) | Good |
| Yamazaki (2022) | ★ | ★ | ★ | ★ |  | ★★ |  | ★ |  | ★ |  | ★★★★★★★★ (8) | Good |

**Note**: A study can be awarded a maximum of one star for each item, except comparability. A maximum of two stars can be awarded for comparability. Good quality denotes 3 or 4 stars in “selection” domain AND 1 or 2 stars in “comparability” domain AND 2 or 3 stars in “exposure/outcome” domain. Fair quality denotes 2 stars in selection domain AND 1 or 2 stars in comparability domain AND 2 or 3 stars in exposure/outcome domain. Poor quality denotes 0 or 1 star in selection domain OR 0 stars in comparability domain OR 0 or 1 stars in exposure/outcome domain.

* Nordenskjold (2013) was the only randomized controlled trial (RCT), and had a ‘low’ risk of bias as follows:


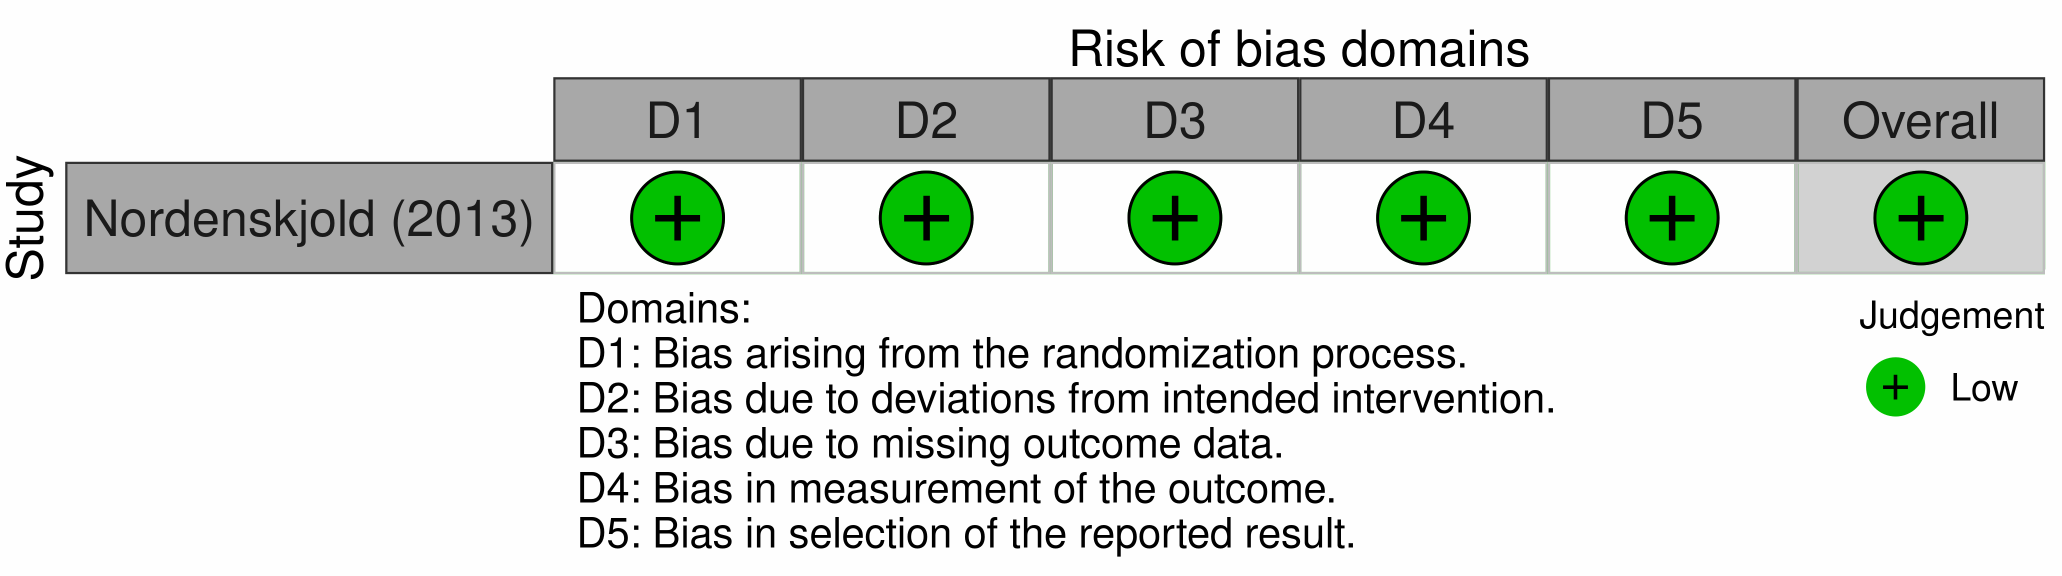


**Supplementary References**

1. Rhee TG, Shim SR, Popp JH, Trikalinos TA, Rosenheck RA, Kellner CH, Seiner SJ, Espinoza RT, Forester BP, McIntyre RS. Efficacy and safety of ketamine-assisted electroconvulsive therapy in major depressive episode: A Systematic review and network meta-analysis. *Molecular Psychiatry*. 2024; 29(3): 750-759.

2. Stroup DF, Berlin JA, Morton SC, Olkin I, Williamson GD, Rennie D, Moher D, Becker BJ, Sipe TA, Thacker SB. Meta-analysis of observational studies in epidemiology: a proposal for reporting. Meta-analysis Of Observational Studies in Epidemiology (MOOSE) group. *JAMA*. 2000; 283(15): 2008-2012.
